# Supplementary material for: Extractive desulfurization of fuel using N-butylpyridinium-based ionic liquids
Source: Royal Society of Chemistry journal article supplement (doi:10.1039/c5ra03762j), 2015-01-01
Supplement: c5ra03762j1.pdf [file c5ra03762j1.pdf]

## Supplementary Information

### **Extractive desulfurization of fuel using N-butylpyridinium-based ionic liquids**

Hongshuai Gao, Shaojuan Zeng, Xiaomin Liu, Yi Nie, Xiangping Zhang\*, Suojiang Zhang\*

Beijing Key Laboratory of Ionic Liquids Clean Process, Key Laboratory of Green Process and Engineering, Institute of Process Engineering, Chinese Academy of Sciences, Beijing 100190, PR China

\*To whom correspondence should be addressed. Telephone: +86-10-82544875.

Fax: +86-10-82544875.

E-mail: xpzhang@ipe.ac.cn, sjzhang@ipe.ac.cn

Institute of Process Engineering, Chinese Academy of Sciences, Beijing, 100190, PR China.

## 1. The $^1\text{H}$ NMR and $^{13}\text{C}$ NMR data of three pyridinium-based ILs

**[C<sub>4</sub>Py][SCN]:**  $^1\text{H}$  NMR( $d_6$ -DMSO) : 0.92(t, 3H), 1.30(m, 2H), 1.91(m, 2H), 4.64 (t, 2H), 8.18(t, 2H), 8.62(t, 1H), 9.13(d, 2H);  $^{13}\text{C}$  NMR( $d_6$ -DMSO) : 145.94, 145.21, 130.08, 128.58, 61.06, 33.14, 19.25, 13.80.

**[C<sub>4</sub>Py][N(CN)<sub>2</sub>]:**  $^1\text{H}$  NMR( $d_6$ -DMSO) : 0.92(t, 3H), 1.30(m, 2H), 1.91(m, 2H), 4.62 (t, 2H), 8.17(t, 2H), 8.61(t, 1H), 9.10(d, 2H);  $^{13}\text{C}$  NMR( $d_6$ -DMSO) : 145.92, 145.19, 128.55, 119.57, 61.07, 33.11, 19.24, 13.76.

**[C<sub>4</sub>Py][NTf<sub>2</sub>]:**  $^1\text{H}$  NMR( $d_6$ -DMSO) : 0.92(t, 3H), 1.31(m, 2H), 1.91(m, 2H), 4.61 (t, 2H), 8.16(t, 2H), 8.61(t, 1H), 9.10(d, 2H);  $^{13}\text{C}$  NMR( $d_6$ -DMSO) : 145.90, 145.19, 128.54, 121.01, 61.07, 33.11, 19.20, 13.67.
